# Supplementary material for: A Novel Nanoprobe for Multimodal Imaging Is Effectively Incorporated into Human Melanoma Metastatic Cell Lines
Source: MDPI journal article supplement (doi:10.3390/ijms160921658), 2015-09-08
Supplement: s1 [file s1]

## Supplementary Information

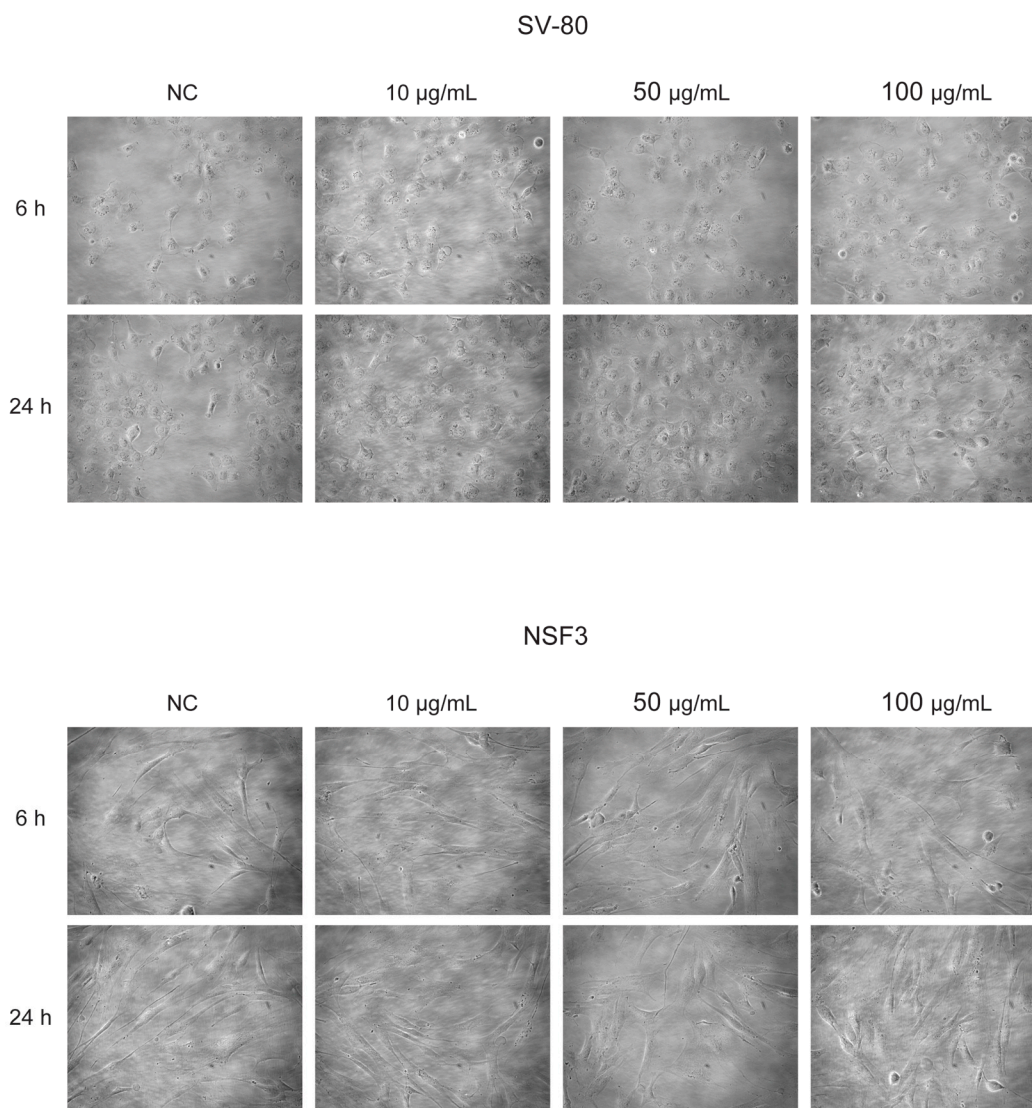

**Figure S1.** Normal fibroblast cell lines do not internalize the nanoprobe after labeling with up to 100  $\mu\text{g/mL}$  for 24 h. The **upper** panel shows fluorescence images overlaid the light microscopy images for the SV-80 lung fibroblast cell line. No fluorescence can be seen, indicating that the nanoprobe is not taken up by the cells. NC = negative control (no labeling). The **lower** panel shows fluorescence images overlaid the light microscopy images for the NSF3 skin fibroblast cell line. Also here, no fluorescence can be detected, indicating no internalization of the nanoprobe. NC = negative control. For both cell lines, labeling concentrations of 0 (NC), 10, 50 and 100  $\mu\text{g/mL}$  for 6 or 24 h were investigated.
